# Supplementary material for: Design of ester crosslinked rubber with high dynamic properties by increasing dynamic covalent bond density
Source: Royal Society of Chemistry journal article supplement (doi:10.1039/d2py01165d), 2022-01-01
Supplement: d2py01165d1.pdf [file d2py01165d1.pdf]

## Supporting Information

### Design of Esters Crosslinked Rubber with High Dynamic Properties by Increasing Dynamic Covalent Bond Density

*Li Yang<sup>a</sup>, Luji Li<sup>a</sup>, Lihua Fu<sup>a</sup>, Baofeng Lin<sup>a</sup>, Yueqiong Wang<sup>b\*</sup>, Chuanhui Xu<sup>a,b\*</sup>*

<sup>a</sup> Guangxi Key Laboratory of Petrochemical Resource Processing and Process Intensification Technology, School of Chemistry and Chemical Engineering, Guangxi University, Nanning 530004, China

<sup>b</sup> Key Laboratory of Tropical Crop Products Processing of Ministry of Agriculture and Rural Affairs, Agricultural Products Processing Research Institute, Chinese Academy of Tropical Agricultural Sciences, Guangdong 524001, China

\* E-mail: xuhuiyee@gxu.edu.cn (*Chuanhui Xu*); yqw215@163.com (*Yueqiong Wang*)

#### 1. Characterization

ESI-ION TRAP mass (ESI-MS) spectrum was recorded with a Thermo Scientific Q Exactive. And ammonium formate was added to adjust pH and help ionization of DGESA.

XRD patterns were recorded on an X-ray diffractometer (Rigaku SMARTLAB, Japan) with Cu K $\alpha$  radiation (40 kV, 40 mA) for a 2 $\theta$  range of 5-60° with a scanning rate of 5°/min.

#### 2. Results and discussion

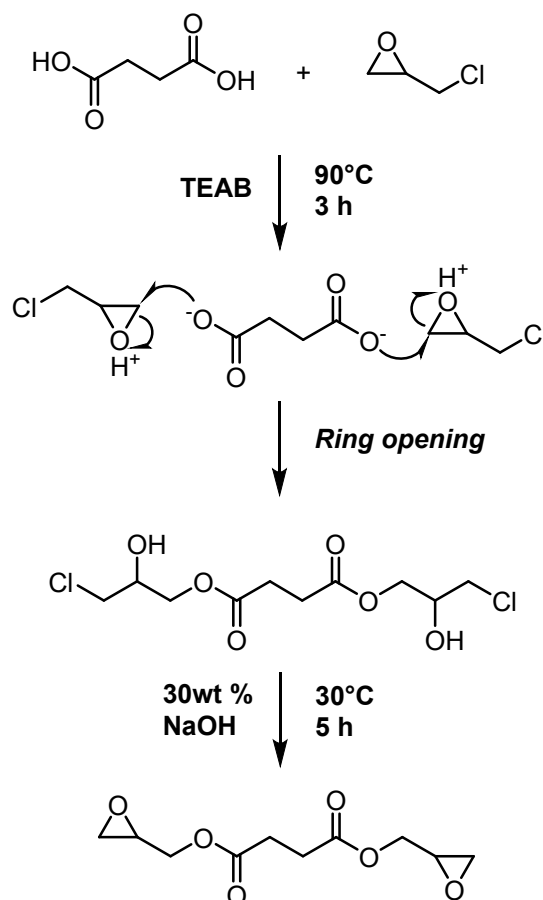

**Scheme S1** Reaction mechanism of DGESA by the reaction of SA with ECH.

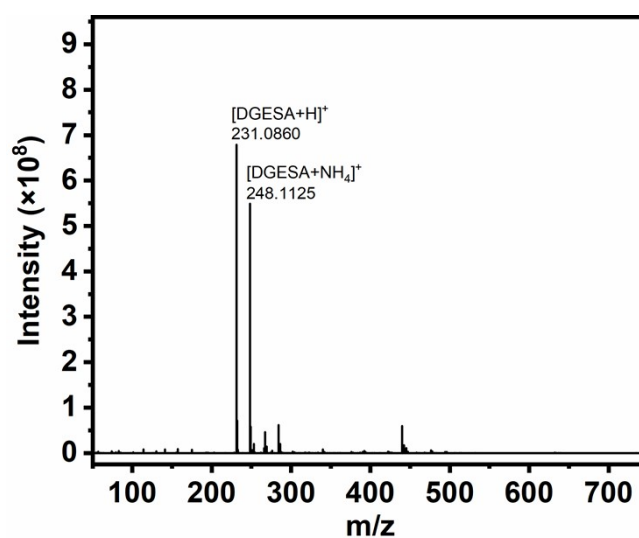

**Figure S1** ESI-MS spectrum of DGESA.

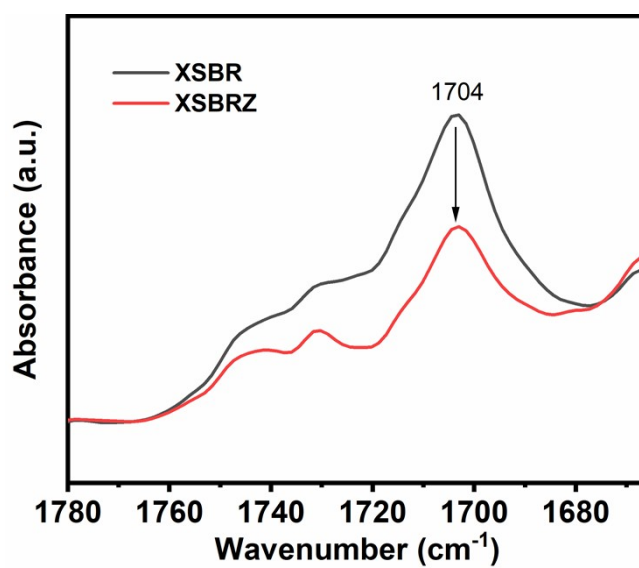

**Figure S2** FTIR spectra of XSBR and XSBRZ.

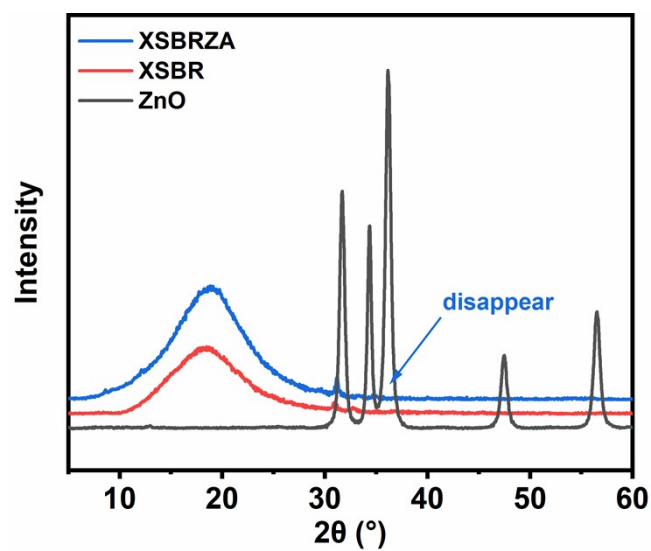

**Figure S3** XRD curves of ZnO, XSBR, and XSBRZA.

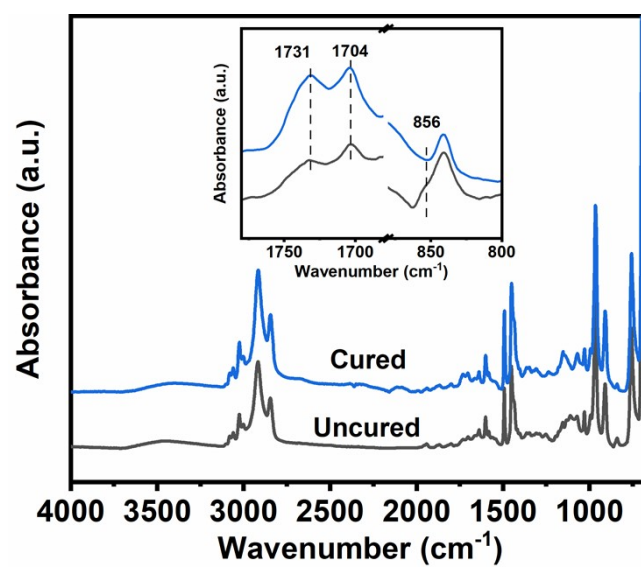

**Figure S4** FTIR spectra of XSBRZO before and after curing.

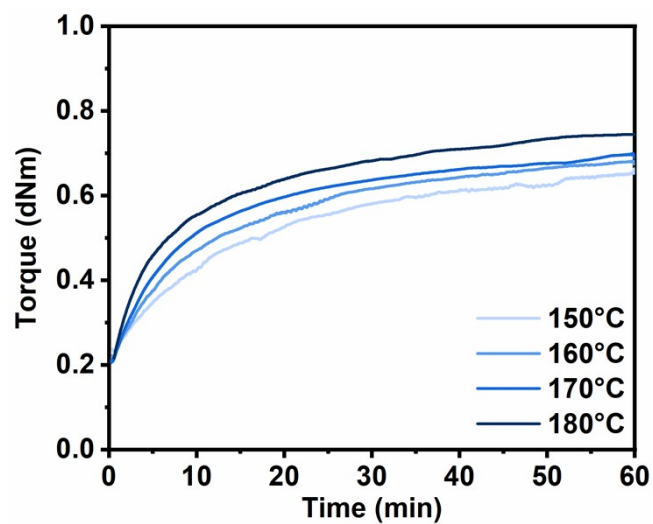

**Figure S5** Curing curves of XSBRZO at different temperatures.

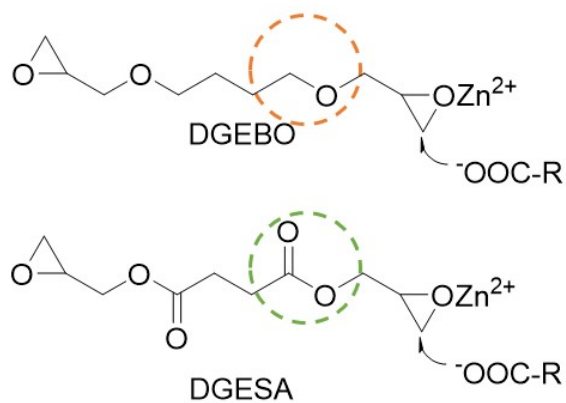

**Figure S6** Reaction mechanism of DGESA and DGEBO with carboxyl group.

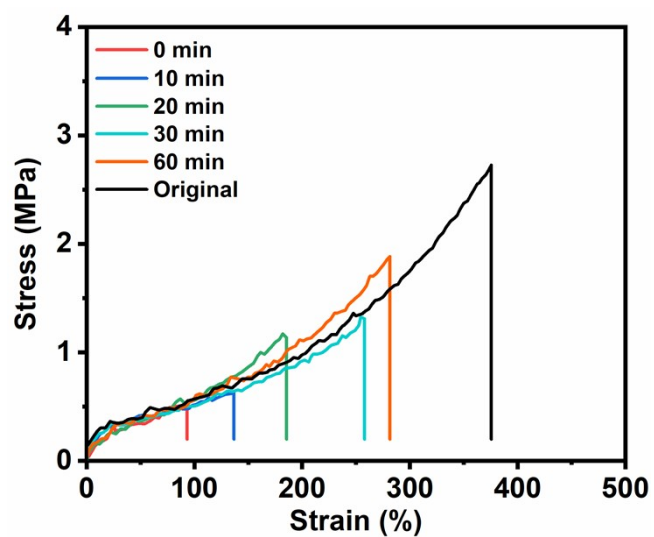

**Figure S7** Typical stress-strain curves of XSBRZO for various healing times at 180°C.

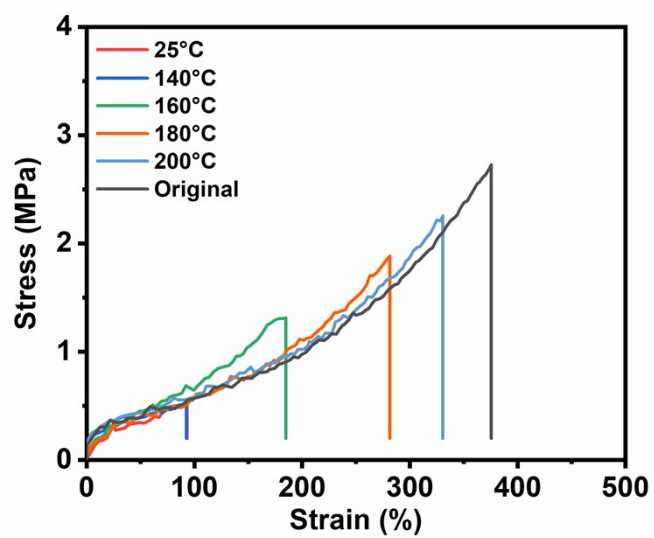

**Figure S8** Typical stress-strain curves of XSBRZO for 60 min at various healing temperatures.

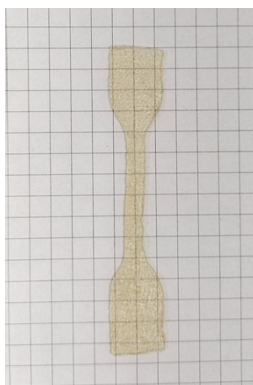

**Figure S9** Photo of 5<sup>th</sup> reprocessed XSBRZO.

#### REFERENCES

- (1) Ma, S.; Liu, X.; Jiang, Y.; Tang, Z.; Zhang, C.; Zhu, J. Bio-based epoxy resin from itaconic acid and its thermosets cured with anhydride and comonomers. *Green Chem.* 2013, 15 (1), 245-254. DOI: 10.1039/c2gc36715g.
- (2) Sun, Y.; Wang, M.; Wang, Z.; Mao, Y.; Jin, L.; Zhang, K.; Xia, Y.; Gao, H. Amine-Cured Glycidyl Esters as Dual Dynamic Epoxy Vitrimers. *Macromolecules* 2022, 55 (2), 523-534. DOI: 10.1021/acs.macromol.1c01914.
- (3) Zhong, L.; Hao, Y.; Zhang, J.; Wei, F.; Li, T.; Miao, M.; Zhang, D. Closed-Loop Recyclable Fully Bio-Based Epoxy Vitrimers from Ferulic Acid-Derived Hyperbranched Epoxy Resin. *Macromolecules* 2022, 55 (2), 595-607. DOI: 10.1021/acs.macromol.1c02247.
